# Supplementary material for: Intakes and Food Sources of Dietary Fibre and Their Associations with Measures of Body Composition and Inflammation in UK Adults: Cross-Sectional Analysis of the Airwave Health Monitoring Study
Source: MDPI journal article supplement (doi:10.3390/nu11081839), 2019-08-08
Supplement: s1 [file s1]

## Online Supplementary Material

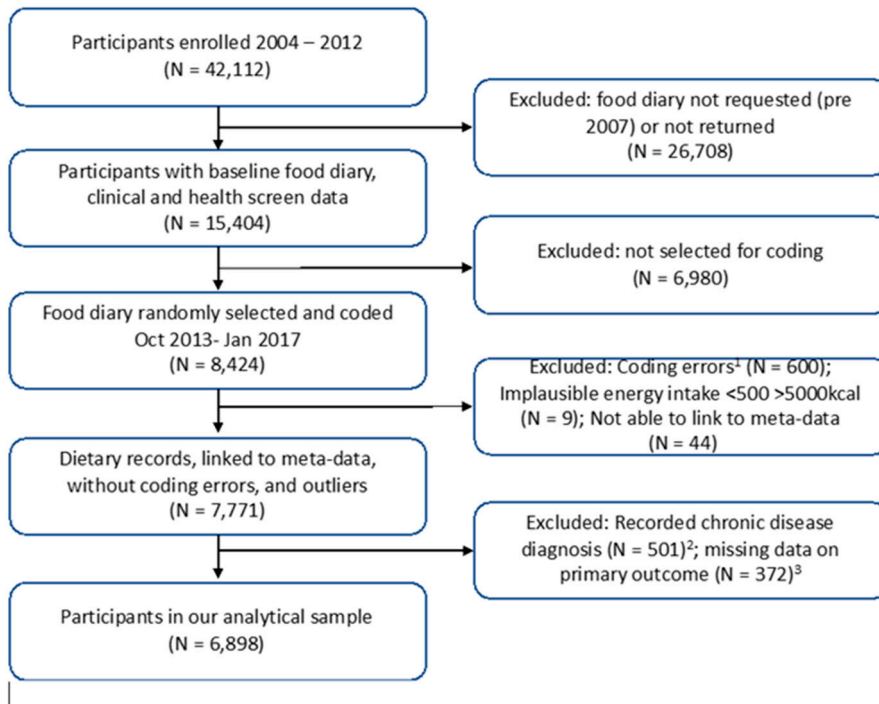

**Figure S 1** Airwave Health Monitoring Study participant flow chart for inclusion in the cross-sectional study: The association between food sources of dietary fibre with measures of body composition and inflammation.

<sup>1</sup> Refer to dietary coding protocol available at: <https://bmjopen.bmj.com/content/7/4/e012927>

<sup>2</sup> Self-report General Practitioner diagnoses of: angina, heart disease, chronic obstructive pulmonary disease, cancer, chronic liver disease, thyroid disease, arthritis, diabetes (type 1 or diagnosed type 2), previous stroke

<sup>3</sup> Missing C-Reactive protein and/or body fat measurement (no participants had missing BMI or waist circumference data)

**Table S1** Food group descriptions applied to the dietary data from the Airwave Health Monitoring Study

| Food group                      | Items included                                                                                                                                                                                                                                                                                                                                                                                                                                                                                                                                      | Items not included                                                                                                                                                                                                                                                                                                                                                                             |
|---------------------------------|-----------------------------------------------------------------------------------------------------------------------------------------------------------------------------------------------------------------------------------------------------------------------------------------------------------------------------------------------------------------------------------------------------------------------------------------------------------------------------------------------------------------------------------------------------|------------------------------------------------------------------------------------------------------------------------------------------------------------------------------------------------------------------------------------------------------------------------------------------------------------------------------------------------------------------------------------------------|
| Whole grains*                   | <p>Amaranth</p> <p>Barley, whole, Barley meal</p> <p>Brown rice, Brown rice flour, Wild rice</p> <p>Buckwheat</p> <p>Bulgur wheat</p> <p>Millett</p> <p>Oats, Oat flour, Oatmeal</p> <p>Popcorn (only include plain)</p> <p>Quinoa</p> <p>Whole wheat flour</p> <p>Shredded wheat</p> <p>Dark rye bread / pumpernickel</p> <p>Muesli</p> <p>Ready Brek / quick cook oats</p> <p>Weetabix, Cheerios, Shreddies, All-bran</p> <p>Whole wheat pasta</p> <p>Ryvita / rye crackers</p> <p>Oatcakes</p> <p>Whole wheat bread</p> <p>Flapjack (% oats)</p> | <p>Barley, pearled</p> <p>Barley malt flour</p> <p>Bran (all grains)</p> <p>Corn flour/meal</p> <p>Couscous</p> <p>Rice (milled, not whole grain)</p> <p>Semolina</p> <p>Wheat flour (milled, not whole grain)</p> <p>Brown flour</p> <p>Brown bread</p> <p>Cornflakes</p> <p>Rice krispie</p> <p>Egg / rice / plain noodles</p> <p>Nutri-grain</p> <p>Granary bread made with white flour</p> |
| Cereal (non-wholegrain sources) | <p>All cereal products – bread, flour, breakfast cereal, rice, crackers, crisp breads.</p> <p>Enriched dough breads – teacakes.</p> <p>Scones. Crumpets. English muffins.</p> <p>Cakes, pastry, biscuits made with cereal flour,</p> <p>Biscuits sweet, sweet pastries and cakes, puddings (sponge, tarts), croissants, Danish pastry, (cereal / dairy based)</p>                                                                                                                                                                                   |                                                                                                                                                                                                                                                                                                                                                                                                |
| Legume                          | <p>Runner, broad beans</p> <p>Garden peas</p> <p>Snow peas (mangetout)</p> <p>Beans</p> <p>Lentils</p> <p>Pea nuts</p> <p>Chickpeas</p>                                                                                                                                                                                                                                                                                                                                                                                                             | <p>Processed soya bean products</p> <p>Bean flours</p> <p>French beans, string beans, snap beans and sugar snaps</p>                                                                                                                                                                                                                                                                           |
| Potato                          | <p>All methods of cooking</p> <p>Chips (friend and oven)</p> <p>Mashed, boiled, crisps</p> <p>Inc. as part of composite dish – e.g. topping on shepherd's pie</p>                                                                                                                                                                                                                                                                                                                                                                                   | <p>Potato flour/starch as added to manufactured foods</p>                                                                                                                                                                                                                                                                                                                                      |

|                                               |                                                                                                                       |                                                                                                                                    |
|-----------------------------------------------|-----------------------------------------------------------------------------------------------------------------------|------------------------------------------------------------------------------------------------------------------------------------|
| Fried / cooked in oil potato                  | Potato crisps (not baked)<br>Fried chips, roasted in oil (all oils)                                                   |                                                                                                                                    |
| Nuts, seeds                                   | Seeds used in seasoning (fennel, cumin, caraway)<br>Sunflower<br>Pumpkin<br>Thaini<br>Pine nut (= seed)               | Seed oils<br>Peanuts (ground nuts)<br>Seeds in fruit<br>Hemp milk<br>Nut milks<br>Coconut<br>Marzipan and as part of confectionary |
| Fruit (UK culinary usage classification)      | Fresh fruit<br>Dried fruit<br>Pre-prepared fruit including frozen and canned)<br>100% pure fruit juices and smoothies | Fruit in cakes and confectionary<br>Jam / chutney<br>Fruit juices as cordial                                                       |
| Vegetables (UK culinary usage classification) | Sweet potato<br>All fresh, and prepared vegetables (frozen, dried, canned). Seaweeds<br>Herbs - fresh<br>Tomatoes     | White potato<br>Cassava<br>Chutney, ketchup<br>Dried herbs                                                                         |

**\*% whole grain content based on manufactures and published declarations**

**Table S2** Cut-off values per quintile group of dietary fibre intake (energy adjusted)

|                                            | 20%  | 40%  | 60%  | 80%   |
|--------------------------------------------|------|------|------|-------|
| Total g/day per 1000 kcal                  | 6.85 | 8.17 | 9.48 | 11.25 |
| Wholegrain g/day per 1000kcal              | 0.20 | 0.70 | 1.30 | 2.09  |
| Legume g/day per 1000kcal                  | 0.08 | 0.30 | 0.53 | 0.93  |
| Fruit g/day (exc. juices) per 1000kcal     | 0.20 | 0.62 | 1.09 | 1.83  |
| Vegetable g/day (exc. potato) per 1000kcal | 0.73 | 1.11 | 1.53 | 2.14  |
| Potato g/day per 1000kcal                  | 0.58 | 0.90 | 1.22 | 1.68  |
| Non-wholegrain cereal g/day per 1000kcal   | 2.65 | 3.17 | 3.66 | 4.36  |

**Table S3** Characteristics of Airwave Health Monitoring Study participants by quintile of energy-adjusted dietary fibre intakes (g/1000kcal) *N* = 6 898

|                                   | Quintile of dietary fibre intake (g/1000kcal) |      |      |      |      |       |      |      |      |      | P <sup>#</sup> |
|-----------------------------------|-----------------------------------------------|------|------|------|------|-------|------|------|------|------|----------------|
|                                   | Q1                                            |      | Q2   |      | Q3   |       | Q4   |      | Q5   |      |                |
| <i>N</i>                          | 1379                                          |      | 1380 |      | 1380 |       | 1380 |      | 1379 |      |                |
| Fibre intake g/1000kcal, mean, SD | 5.8                                           | 0.8  | 7.5  | 0.4  | 8.8  | 0.4   | 10.3 | 0.5  | 13.3 | 2.0  |                |
| <b>Men N (%)</b>                  | 952                                           | 69.0 | 864  | 62.6 | 876  | 63.5  | 810  | 58.7 | 781  | 52.1 | <0.0001        |
| <b>Age, years (SD)</b>            | 39.3                                          | 9.1  | 40.3 | 9.0  | 41.5 | 8.8   | 41.9 | 9.0  | 42.6 | 9.2  |                |
| <b>White N (%)</b>                | 1324                                          | 96.1 | 1340 | 97.2 | 1344 | 97.46 | 1350 | 97.9 | 1349 | 97.8 | 0.0236         |
| <b>Relationship status</b>        |                                               |      |      |      |      |       |      |      |      |      | 0.06           |
| Cohabiting                        | 249                                           | 18.7 | 234  | 17.4 | 218  | 16.1  | 217  | 16.1 | 207  | 15.3 |                |
| Divorced/separated                | 111                                           | 8.4  | 100  | 7.4  | 114  | 8.4   | 108  | 8    | 107  | 7.9  |                |
| Married                           | 799                                           | 60.2 | 860  | 63.7 | 893  | 65.8  | 890  | 64.8 | 866  | 64.1 |                |
| Single                            | 169                                           | 12.7 | 155  | 11.5 | 132  | 9.7   | 137  | 10.3 | 170  | 12.6 |                |
| <i>Missing</i>                    | 51                                            |      | 31   |      | 23   |       | 28   |      | 29   |      |                |
| <b>Education</b>                  |                                               |      |      |      |      |       |      |      |      |      | 0.0135         |
| Left school before taking GCSE    | 56                                            | 4.1  | 41   | 3    | 42   | 3     | 54   | 3.9  | 66   | 4.8  |                |
| GCSE or equivalent                | 420                                           | 30.5 | 419  | 30.4 | 385  | 27.9  | 418  | 30.3 | 407  | 29.5 |                |
| Vocational qualifications         | 114                                           | 8.3  | 119  | 8.6  | 93   | 6.7   | 87   | 6.3  | 85   | 6.2  |                |
| A-levels / Highers or equivalent  | 460                                           | 33.4 | 437  | 31.7 | 450  | 32.6  | 444  | 32.2 | 427  | 31   |                |
| Bachelor's degree or equivalent   | 261                                           | 18.9 | 287  | 20.8 | 310  | 22.5  | 279  | 20   | 305  | 22.1 |                |
| Postgraduate qualifications       | 68                                            | 4.9  | 76   | 5.5  | 100  | 7.25  | 98   | 7.1  | 89   | 6.5  |                |
| <b>Employment force, country</b>  |                                               |      |      |      |      |       |      |      |      |      | <0.0001        |
| England                           | 958                                           | 69.7 | 1006 | 73   | 1035 | 75.2  | 1072 | 77.7 | 1104 | 80.3 |                |
| Scotland                          | 310                                           | 22.6 | 261  | 18.9 | 217  | 15.8  | 175  | 12.7 | 130  | 9.4  |                |
| Wales                             | 106                                           | 7.7  | 111  | 8.1  | 124  | 9     | 132  | 9.6  | 141  | 10.2 |                |
| <i>Missing</i>                    | 5                                             |      | 2    |      | 4    |       | 1    |      | 4    |      |                |
| <b>Rank</b>                       |                                               |      |      |      |      |       |      |      |      |      | <0.0001        |
| Police Constable/ Sergeant        | 74                                            | 6.3  | 77   | 6.7  | 102  | 9.2   | 86   | 7.9  | 94   | 8.5  |                |
| Inspector and above               | 775                                           | 66.3 | 713  | 62.2 | 636  | 57.2  | 600  | 55.2 | 571  | 51.5 |                |
| Police staff / Other              | 320                                           | 27.4 | 356  | 31.1 | 373  | 33.6  | 402  | 39.9 | 444  | 40.0 |                |
| <i>Missing</i>                    | 210                                           |      | 234  |      | 269  |       | 292  |      | 270  |      |                |

|                                         |       |       |       |       |       |       |       |       |       |       |         |
|-----------------------------------------|-------|-------|-------|-------|-------|-------|-------|-------|-------|-------|---------|
| <b>Hours worked per week</b>            |       |       |       |       |       |       |       |       |       |       | <0.0001 |
| <35                                     | 68    | 4.9   | 114   | 8.3   | 131   | 9.5   | 139   | 10.1  | 144   | 10.4  |         |
| 35 <40                                  | 477   | 34.6  | 512   | 37.1  | 513   | 37.2  | 542   | 39.3  | 593   | 43.0  |         |
| 40 <49                                  | 511   | 37.1  | 466   | 33.8  | 452   | 32.8  | 430   | 31.2  | 401   | 29.1  |         |
| 49 <55                                  | 165   | 12.0  | 153   | 10.4  | 151   | 10.9  | 127   | 9.2   | 140   | 10.2  |         |
| 55+                                     | 158   | 11.5  | 145   | 10.5  | 133   | 9.6   | 142   | 10.3  | 101   | 7.3   |         |
|                                         |       |       |       |       |       |       |       |       |       |       |         |
| <b>Physical activity (MET category)</b> |       |       |       |       |       |       |       |       |       |       | <0.0001 |
| Low                                     | 188   | 13.6  | 159   | 11.5  | 163   | 11.8  | 130   | 9.4   | 132   | 9.6   |         |
| Moderate                                | 687   | 49.8  | 650   | 47.1  | 619   | 44.9  | 582   | 42.2  | 549   | 39.8  |         |
| High                                    | 504   | 36.6  | 571   | 41.4  | 598   | 43.3  | 668   | 48.4  | 698   | 50.6  |         |
| <b>Smoking status</b>                   |       |       |       |       |       |       |       |       |       |       | <0.0001 |
| Never smoker                            | 890   | 64.8  | 946   | 68.8  | 977   | 71.1  | 971   | 70.6  | 996   | 72.4  |         |
| Former smoker                           | 307   | 22.3  | 299   | 21.8  | 293   | 21.3  | 324   | 23.6  | 319   | 23.2  |         |
| Current smoker                          | 177   | 12.9  | 130   | 9.5   | 105   | 7.6   | 81    | 5.9   | 61    | 4.4   |         |
| <i>Missing</i>                          | 5     |       | 5     |       | 5     |       | 4     |       | 3     |       |         |
| <b>Weekly TV viewing</b>                |       |       |       |       |       |       |       |       |       |       | 0.0022  |
| Low (< 6 hours)                         | 363   | 26.3  | 421   | 30.5  | 410   | 29.7  | 416   | 30.1  | 438   | 31.8  |         |
| Moderate (6 – 15 hours)                 | 622   | 45.1  | 584   | 42.3  | 605   | 43.8  | 629   | 45.6  | 635   | 46.1  |         |
| High (>15 hours)                        | 394   | 28.6  | 375   | 27.2  | 365   | 26.4  | 335   | 24.3  | 306   | 22.2  |         |
| <b>Body mass index category</b>         |       |       |       |       |       |       |       |       |       |       | 0.0004  |
| Healthy (<25kg/m <sup>2</sup> )         | 397   | 28.8  | 471   | 34.1  | 437   | 31.7  | 487   | 32.3  | 511   | 37.1  |         |
| Overweight (>25 <30kg/m <sup>2</sup> )  | 702   | 50.9  | 651   | 47.2  | 658   | 47.7  | 649   | 47.0  | 628   | 45.5  |         |
| Obese (>30kg/m <sup>2</sup> )           | 280   | 20.3  | 258   | 18.7  | 285   | 20.6  | 244   | 17.7  | 240   | 17.4  |         |
| <b>Source fibre: mean, SD</b>           |       |       |       |       |       |       |       |       |       |       |         |
| % whole grains                          | 7.19  | 8.37  | 9.66  | 8.45  | 12.84 | 9.20  | 15.02 | 9.45  | 17.37 | 9.90  | <0.0001 |
| % fruit (exc. juice)                    | 6.73  | 7.34  | 9.38  | 8.07  | 11.04 | 8.35  | 13.23 | 9.41  | 15.81 | 9.86  | <0.0001 |
| % veg (exc. Legumes and potato)         | 14.42 | 8.92  | 15.68 | 7.82  | 16.25 | 7.87  | 16.65 | 8.41  | 17.92 | 9.12  | <0.0001 |
| % legume                                | 4.46  | 5.06  | 5.67  | 5.57  | 6.00  | 5.37  | 6.23  | 5.67  | 7.44  | 6.25  | <0.0001 |
| % nuts and seeds                        | 0.45  | 1.51  | 0.53  | 1.44  | 0.68  | 1.54  | 0.81  | 2.04  | 0.99  | 2.95  | <0.0001 |
| % potatoes                              | 13.83 | 9.19  | 11.79 | 7.21  | 10.69 | 6.66  | 9.58  | 6.45  | 8.15  | 5.98  | <0.0001 |
| % non-wholegrain cereal sources         | 48.76 | 12.71 | 43.82 | 10.88 | 39.71 | 10.40 | 36.36 | 10.54 | 30.95 | 11.17 | <0.0001 |

| <b>Nutrient intakes, mean SD</b>        |        |       |        |       |        |       |        |       |        |        |         |
|-----------------------------------------|--------|-------|--------|-------|--------|-------|--------|-------|--------|--------|---------|
| Energy, mean kcal/day                   | 2047.6 | 508.6 | 1991.6 | 500.4 | 1947.2 | 457.7 | 1868.7 | 467.3 | 1761.3 | 462.9  | <0.0001 |
| % energy intake – total fat             | 35.45  | 5.42  | 34.89  | 5.20  | 34.09  | 4.94  | 32.69  | 4.96  | 30.24  | 5.39   | <0.0001 |
| % energy intake – saturated fat         | 13.43  | 2.90  | 13.03  | 2.73  | 12.48  | 2.58  | 11.84  | 2.58  | 10.51  | 2.60   | <0.0001 |
| % energy intake – PUFA                  | 5.72   | 1.53  | 5.83   | 1.62  | 5.85   | 1.59  | 5.67   | 1.52  | 5.59   | 1.71   | <0.0001 |
| % energy intake - carbohydrate          | 43.78  | 7.41  | 45.72  | 6.39  | 46.85  | 6.12  | 48.55  | 6.01  | 51.00  | 6.32   | <0.0001 |
| % energy intake NME                     | 13.32  | 5.80  | 12.19  | 5.03  | 11.81  | 4.64  | 11.37  | 4.26  | 10.23  | 4.34   | <0.0001 |
| % energy intake - protein               | 16.53  | 3.84  | 16.72  | 3.09  | 16.96  | 3.00  | 17.34  | 3.27  | 18.17  | 3.60   | <0.0001 |
| <b>Median IQR</b>                       |        |       |        |       |        |       |        |       |        |        |         |
| % energy intake – Alcohol*              | 6.7    | 9.05  | 5.42   | 7.18  | 5.00   | 6.46  | 4.59   | 5.84  | 3.9    | 5.49   | <0.0001 |
| Vegetables grams/1000kcal               | 42.7   | 31.70 | 57.35  | 38.95 | 68.08  | 42.93 | 78.00  | 52.90 | 100.4  | 70.83  | <0.0001 |
| Fruit grams/1000kcal exc juice          | 14.0   | 33.16 | 31.87  | 43.01 | 44.85  | 52.90 | 49.34  | 61.30 | 105.2  | 70.89  | <0.0001 |
| Wholegrain grams/1000kcal               | 4.6    | 9.69  | 8.98   | 11.95 | 14.58  | 14.43 | 19.76  | 17.36 | 28.4   | 21.96  | <0.0001 |
| Potato and products g/1000kcal          | 31.9   | 27.74 | 35.36  | 28.78 | 37.54  | 31.94 | 38.94  | 31.82 | 41.8   | 39.19  | <0.0001 |
| Legumes (inc. peanut) g/1000kcal        | 5.1    | 9.14  | 8.14   | 10.75 | 10.33  | 12.04 | 12.21  | 14.19 | 17.5   | 18.24  | <0.0001 |
| Total dairy grams/1000kcal              | 98.0   | 78.37 | 110.73 | 78.90 | 120.33 | 81.62 | 133.09 | 86.29 | 140.8  | 100.41 | <0.0001 |
| Fish grams/1000kcal                     | 7.0    | 15.40 | 8.87   | 18.00 | 9.29   | 16.88 | 11.54  | 17.93 | 13.7   | 21.59  | <0.0001 |
| Total red and processed meat g/1000kcal | 21.2   | 18.91 | 20.71  | 14.12 | 18.57  | 13.04 | 17.38  | 13.18 | 14.7   | 13.46  | <0.0001 |
| Sugar sweetened drinks g/1000kcal       | 54.4   | 150.9 | 34.12  | 116.5 | 28.98  | 94.63 | 18.69  | 76.57 | 0.0    | 45.00  | <0.0001 |
| Sodium mg/1000kcal                      | 384.5  | 636.4 | 366.4  | 683.0 | 372.5  | 688.0 | 411.9  | 517.2 | 459.1  | 389.7  | 0.0245  |

#Association between categorical variables tested by Chi-squared analysis (missing values excluded), across normal distributed data (mean SD) general linear models were applied, across non-normal distributed data (median IQR) Kruskal-Wallis test. \*consumers of alcohol only. Abbreviations: BIA bio electrical impedance, CRP C-reactive protein, GCSE general certificate secondary education, IQR interquartile range, MET metabolic equivalents, PUFA poly unsaturated fatty acids, NME non-milk extrinsic sugars, SD standard deviation.

**Table S4** The association between fibre intakes and measures of body composition and inflammation - estimated beta coefficients (95% confidence intervals).

|                                          |          |                  | 95% Confidence intervals |       |         |
|------------------------------------------|----------|------------------|--------------------------|-------|---------|
|                                          |          | Beta coefficient | lower                    | upper | P       |
| <b>Body Mass Index, kg/m<sup>2</sup></b> |          |                  |                          |       |         |
| Total fibre                              | Crude    | -0.07            | -0.10                    | -0.03 | <0.0001 |
|                                          | Adjusted | -0.13            | -0.17                    | -0.09 | <0.0001 |
| Wholegrain fibre*                        | Crude    | -0.45            | -0.63                    | -0.26 | <0.0001 |
|                                          | Adjusted | -0.40            | -0.60                    | -0.20 | <0.0001 |
| Cereal non-whole grain*                  | Crude    | -0.41            | -0.72                    | -0.11 | 0.008   |
|                                          | Adjusted | -0.40            | -0.73                    | -0.07 | 0.018   |
| Fruit fibre*                             | Crude    | -0.60            | -0.77                    | -0.42 | <0.0001 |
|                                          | Adjusted | -0.57            | -0.77                    | -0.38 | <0.0001 |
| Vegetable and legume fibre*              | Crude    | -0.15            | -0.36                    | 0.06  | 0.16    |
|                                          | Adjusted | -0.26            | -0.48                    | -0.04 | 0.02    |
| Potato fibre*                            | Crude    | 0.56             | 0.30                     | 0.82  | <0.0001 |
|                                          | Adjusted | 0.05             | -0.28                    | 0.39  | 0.76    |
| <b>Percentage body fat, %</b>            |          |                  |                          |       |         |
| Total fibre                              | Crude    | -0.17            | -0.23                    | -0.12 | <0.0001 |
|                                          | Adjusted | -0.19            | -0.26                    | -0.13 | <0.0001 |
| Wholegrain fibre*                        | Crude    | -1.06            | -1.3                     | -0.77 | <0.0001 |
|                                          | Adjusted | -0.57            | -0.88                    | -0.26 | 0.0003  |
| Cereal non-whole grain*                  | Crude    | -0.94            | -1.43                    | -0.45 | 0.0002  |
|                                          | Adjusted | -0.46            | -0.99                    | 0.059 | 0.08    |
| Fruit fibre*                             | Crude    | -1.47            | 1.74                     | -1.19 | <0.0001 |
|                                          | Adjusted | -0.96            | -1.26                    | -0.64 | <0.0001 |
| Vegetable and legume fibre*              | Crude    | -0.27            | -0.61                    | 0.06  | 0.11    |
|                                          | Adjusted | -0.19            | 0.30                     | -0.54 | 0.17    |
| Potato fibre*                            | Crude    | 1.63             | 1.21                     | 2.05  | <0.0001 |
|                                          | Adjusted | 0.45             | -0.07                    | 0.98  | 0.09    |
| <b>Waist circumference, cm</b>           |          |                  |                          |       |         |
| Total fibre                              | Crude    | -0.28            | -0.36                    | -0.19 | <0.0001 |
|                                          | Adjusted | -0.34            | -0.44                    | -0.23 | <0.0001 |
| Wholegrain fibre*                        | Crude    | -1.52            | -1.99                    | -1.05 | <0.0001 |
|                                          | Adjusted | -0.95            | -1.45                    | -0.46 | 0.0002  |
| Cereal non-whole grain*                  | Crude    | -1.08            | -1.84                    | -0.32 | 0.006   |
|                                          | Adjusted | -0.51            | -1.34                    | 0.32  | 0.23    |
| Fruit fibre*                             | Crude    | -2.16            | -2.60                    | -1.73 | <0.0001 |
|                                          | Adjusted | -1.68            | -2.17                    | -1.19 | <0.0001 |
| Vegetable and legume fibre*              | Crude    | -0.72            | -1.24                    | -0.20 | 0.01    |
|                                          | Adjusted | -0.60            | -1.16                    | -0.04 | 0.04    |
| Potato fibre*                            | Crude    | 2.02             | 1.37                     | 2.67  | <0.0001 |



|                                 |          |       |       |       |         |
|---------------------------------|----------|-------|-------|-------|---------|
|                                 | Adjusted | 0.73  | -0.10 | 1.57  | 0.09    |
| <b>C-reactive protein, mg/L</b> |          |       |       |       |         |
| Total fibre                     | Crude    | -0.03 | -0.04 | -0.02 | <0.0001 |
|                                 | Adjusted | -0.03 | -0.04 | -0.02 | <0.0001 |
| Wholegrain fibre*               | Crude    | -0.13 | -0.18 | -0.09 | <0.0001 |
|                                 | Adjusted | -0.04 | -0.09 | 0.007 | 0.09    |
| Cereal non-whole grain*         | Crude    | -0.10 | -0.18 | -0.02 | 0.011   |
|                                 | Adjusted | -0.02 | -0.11 | 0.06  | 0.62    |
| Fruit fibre*                    | Crude    | -0.22 | -0.26 | -0.17 | <0.0001 |
|                                 | Adjusted | -0.14 | -0.18 | -0.09 | <0.0001 |
| Vegetable and legume fibre*     | Crude    | -0.13 | -0.18 | -0.08 | <0.0001 |
|                                 | Adjusted | -0.08 | 0.06  | 0.18  | 0.00    |
| Potato fibre*                   | Crude    | 0.18  | 0.12  | 0.25  | <0.0001 |
|                                 | Adjusted | 0.06  | -0.02 | 0.15  | 0.15    |

All fibre intakes reported in g/1000kcal. Total fibre regression coefficient represents change in outcome measure per 1g/1000kcal day increase in fibre. \*Square root transformation applied to independent variable (fibre intake) for linear regression - regression coefficient change in outcome measure per square root (1g/1000kcal day) increase in fibre.

Crude: Adjusted for age and sex. Adjusted Model additionally adjusted for age and sex, ethnic category, marital status, final attained educational level, length or weekly working hours, smoking (current, previous, never), daily TV viewing hours and physical activity (IPAQ category) and continuous variable: alcohol intake (median g/day), continuous variables of mean daily intakes of: total energy, energy from saturated fat, polyunsaturated fat, non-milk extrinsic sugars (continuous variables), other sources fibre than one under study (continuous variables) and potato fibre additionally adjusted for fried potato consumption (categorical: non-consumers, low and high). C-reactive protein log transformed for analyses.

**Table S5 and 6: Stratified by body mass index category****Table S5** Estimated mean waist circumference, C-reactive protein, and body fat percentage by quintile of energy-adjusted total fibre intake (g/1000kcal) of Airwave Health Monitoring Study participants with a healthy body mass index <25kg/m<sup>2</sup> (N = 2 303)

|                          | Quintiles of energy adjusted total fibre intake (g/1000kcal) |      |       |      |       |      |       |      |       |      | <i>P<sub>trend</sub></i> |
|--------------------------|--------------------------------------------------------------|------|-------|------|-------|------|-------|------|-------|------|--------------------------|
|                          | Q1                                                           |      | Q2    |      | Q3    |      | Q4    |      | Q5    |      |                          |
|                          | Adjusted mean SE                                             |      |       |      |       |      |       |      |       |      |                          |
| Waist circumference, cm  |                                                              |      |       |      |       |      |       |      |       |      |                          |
| Model 1                  | 88.35                                                        | 0.46 | 87.46 | 0.44 | 87.47 | 0.44 | 86.25 | 0.44 | 85.63 | 0.43 | <0.0001                  |
| Model 2                  | 88.52                                                        | 0.80 | 87.61 | 0.80 | 87.36 | 0.80 | 86.27 | 0.81 | 85.26 | 0.83 | <0.0001                  |
| C-Reactive protein, mg/L |                                                              |      |       |      |       |      |       |      |       |      |                          |
| Model 1                  | 1.07                                                         | 1.04 | 0.96  | 1.04 | 0.97  | 1.04 | 0.83  | 1.04 | 0.75  | 1.04 | <0.0001                  |
| Model 2                  | 1.12                                                         | 1.07 | 1.03  | 1.07 | 1.04  | 1.07 | 0.91  | 1.07 | 0.83  | 1.08 | <0.0001                  |
| Body fat, %              |                                                              |      |       |      |       |      |       |      |       |      |                          |
| Model 1                  | 27.54                                                        | 0.29 | 26.74 | 0.27 | 26.87 | 0.27 | 25.85 | 0.27 | 25.85 | 0.27 | <0.0001                  |
| Model 2                  | 27.32                                                        | 0.49 | 26.74 | 0.49 | 26.71 | 0.49 | 25.80 | 0.50 | 25.60 | 0.51 | <0.0001                  |

Adjusted means and standard error of the mean (SE) presented. Orthogonal polynomial coefficients derived from median intake in each quintile were applied to estimate p-trend across quintiles of intake using general linear models. Model 1: age, and sex. Model 2 adjusted for: age, sex ethnic category, marital status, final attained educational level, length or weekly working hours, smoking (current, previous, never), daily TV viewing hours and physical activity (IPAQ category) and continuous variable: alcohol intake (median g/day), continuous variables of mean daily intakes of: total energy, energy from saturated fat, polyunsaturated fat, non-milk extrinsic sugars (continuous variables). C-reactive protein log transformed for analyses.

**Table S6** Estimated mean waist circumference, C-reactive protein, and body fat percentage by quintile of energy-adjusted total fibre intake (g/1000kcal) of Airwave Health Monitoring Study participants with a body mass index  $\geq 25\text{kg/m}^2$  (N = 4 595)

|                          | Quintiles of energy adjusted total fibre intake (g/1000kcal) |      |       |      |       |      |       |      |       |      |             |
|--------------------------|--------------------------------------------------------------|------|-------|------|-------|------|-------|------|-------|------|-------------|
|                          | Q1                                                           |      | Q2    |      | Q3    |      | Q4    |      | Q5    |      | $P_{trend}$ |
|                          | Adjusted mean SE                                             |      |       |      |       |      |       |      |       |      |             |
| Waist circumference, cm  |                                                              |      |       |      |       |      |       |      |       |      |             |
| Model 1                  | 93.7                                                         | 0.3  | 93.1  | 0.3  | 93.1  | 0.3  | 92.0  | 0.3  | 91.8  | 0.3  | <0.0001     |
| Model 2                  | 93.8                                                         | 0.5  | 93.2  | 0.5  | 93.3  | 0.5  | 92.2  | 0.5  | 91.9  | 0.6  | <0.0001     |
| C-Reactive protein, mg/L |                                                              |      |       |      |       |      |       |      |       |      |             |
| Model 1                  | 1.33                                                         | 1.03 | 1.32  | 1.03 | 1.23  | 1.03 | 1.14  | 1.03 | 1.07  | 1.03 | <0.0001     |
| Model 2                  | 1.34                                                         | 1.06 | 1.37  | 1.06 | 1.30  | 1.06 | 1.22  | 1.06 | 1.16  | 1.06 | <0.0001     |
| Body fat, %              |                                                              |      |       |      |       |      |       |      |       |      |             |
| Model 1                  | 31.27                                                        | 0.17 | 31.12 | 0.17 | 30.92 | 0.17 | 30.51 | 0.17 | 30.44 | 0.17 | <0.0001     |
| Model 2                  | 31.16                                                        | 0.30 | 31.09 | 0.30 | 30.93 | 0.30 | 30.52 | 0.30 | 30.40 | 0.32 | 0.0012      |

Adjusted means and standard error of the mean (SE) presented. Orthogonal polynomial coefficients derived from median intake in each quintile were applied to estimate p-trend across quintiles of intake using general linear models. Model 1: age, and sex. Model 2 adjusted for: age, sex ethnic category, marital status, final attained educational level, length or weekly working hours, smoking (current, previous, never), daily TV viewing hours and physical activity (IPAQ category) and continuous variable: alcohol intake (median g/day), continuous variables of mean daily intakes of: total energy, energy from saturated fat, polyunsaturated fat, non-milk extrinsic sugars (continuous variables). C-reactive protein log transformed for analyses.

**Table S 7 and S 8: Stratified by carbohydrate intake**

**Table S 7** Relationships between total fibre intake (g/1000kcal) and body mass index, waist circumference, C-reactive protein and body fat of Airwave Health Monitoring Study participants with high carbohydrate intake ( $\geq 50\%$  EI carbohydrate) (N = 2 357)

|                                    | Quintiles of energy adjusted total fibre intake (g/1000kcal) |      |       |      |       |      |       |      |       |      |                          |
|------------------------------------|--------------------------------------------------------------|------|-------|------|-------|------|-------|------|-------|------|--------------------------|
|                                    | Q1                                                           |      | Q2    |      | Q3    |      | Q4    |      | Q5    |      | <i>P<sub>trend</sub></i> |
|                                    | Adjusted mean SE                                             |      |       |      |       |      |       |      |       |      |                          |
| Body mass index, kg/m <sup>2</sup> |                                                              |      |       |      |       |      |       |      |       |      |                          |
| Model 1                            | 26.45                                                        | 0.24 | 26.11 | 0.21 | 26.68 | 0.19 | 26.31 | 0.16 | 26.15 | 0.14 | 0.43                     |
| Model 2                            | 27.03                                                        | 0.37 | 26.72 | 0.35 | 27.11 | 0.33 | 26.59 | 0.32 | 26.14 | 0.33 | 0.0078                   |
| Waist circumference, cm            |                                                              |      |       |      |       |      |       |      |       |      |                          |
| Model 1                            | 87.01                                                        | 0.61 | 86.40 | 0.53 | 87.28 | 0.48 | 86.37 | 0.41 | 85.60 | 0.35 | 0.0451                   |
| Model 2                            | 88.04                                                        | 0.92 | 87.54 | 0.88 | 88.06 | 0.84 | 87.05 | 0.80 | 85.73 | 0.82 | 0.0042                   |
| C-Reactive protein, mg/L           |                                                              |      |       |      |       |      |       |      |       |      |                          |
| Model 1                            | 0.95                                                         | 1.06 | 0.97  | 1.06 | 1.01  | 1.05 | 0.90  | 1.04 | 0.78  | 1.04 | 0.0016                   |
| Model 2                            | 0.94                                                         | 1.10 | 0.98  | 1.10 | 1.03  | 1.09 | 0.91  | 1.09 | 0.81  | 1.09 | 0.05                     |
| Body fat, %                        |                                                              |      |       |      |       |      |       |      |       |      |                          |
| Model 1                            | 27.19                                                        | 0.40 | 26.54 | 0.35 | 26.80 | 0.32 | 26.47 | 0.27 | 26.16 | 0.23 | 0.0355                   |
| Model 2                            | 27.32                                                        | 0.60 | 26.90 | 0.57 | 26.97 | 0.54 | 26.54 | 0.52 | 25.84 | 0.53 | 0.0043                   |

Adjusted means and standard error of the mean (SE) presented. Orthogonal polynomial coefficients derived from median intake in each quintile were applied to estimate p-trend across quintiles of intake using general linear models. Model 1: age and sex. Model 2 adjusted for: age, sex ethnic category, marital status, final attained educational level, length or weekly working hours, smoking (current, previous, never), daily TV viewing hours and physical activity (IPAQ category) and continuous variable: alcohol intake (median g/day), continuous variables of mean daily intakes of: total energy, energy from saturated fat, polyunsaturated fat, non-milk extrinsic sugars (continuous variables). C-reactive protein log transformed for analyses.

**Table S 8** Relationships between total fibre intake (g/1000kcal) and body mass index, waist circumference, C-reactive protein and body fat of Airwave Health Monitoring Study participants with low carbohydrate intake (<50% EI carbohydrate) (N = 4 541)

|                                    | Quintiles of energy adjusted total fibre intake (g/1000kcal) |      |       |      |       |      |       |      |       |      | <i>P<sub>trend</sub></i> |
|------------------------------------|--------------------------------------------------------------|------|-------|------|-------|------|-------|------|-------|------|--------------------------|
|                                    | Q1                                                           | Q2   | Q3    | Q4   | Q5    |      |       |      |       |      |                          |
|                                    | Adjusted mean SE                                             |      |       |      |       |      |       |      |       |      |                          |
| Body mass index, kg/m <sup>2</sup> |                                                              |      |       |      |       |      |       |      |       |      |                          |
| Model 1                            | 27.13                                                        | 0.12 | 26.95 | 0.12 | 26.94 | 0.12 | 26.65 | 0.13 | 26.82 | 0.15 | 0.0467                   |
| Model 2                            | 27.31                                                        | 0.23 | 27.02 | 0.23 | 26.93 | 0.24 | 26.52 | 0.25 | 26.57 | 0.26 | 0.0001                   |
| Waist circumference, cm            |                                                              |      |       |      |       |      |       |      |       |      |                          |
| Model 1                            | 89.21                                                        | 0.29 | 88.37 | 0.30 | 88.22 | 0.31 | 87.43 | 0.33 | 87.61 | 0.39 | 0.0003                   |
| Model 2                            | 89.47                                                        | 0.57 | 88.57 | 0.58 | 88.31 | 0.59 | 87.39 | 0.62 | 87.40 | 0.65 | <0.0001                  |
| C-Reactive protein, mg/L           |                                                              |      |       |      |       |      |       |      |       |      |                          |
| Model 1                            | 1.11                                                         | 1.03 | 1.02  | 1.03 | 0.98  | 1.03 | 0.89  | 1.03 | 0.86  | 1.04 | <0.0001                  |
| Model 2                            | 1.20                                                         | 1.06 | 1.12  | 1.06 | 1.08  | 1.06 | 0.98  | 1.06 | 0.95  | 1.07 | <0.0001                  |
| Body fat, %                        |                                                              |      |       |      |       |      |       |      |       |      |                          |
| Model 1                            | 28.40                                                        | 0.19 | 27.93 | 0.19 | 27.81 | 0.20 | 27.22 | 0.21 | 27.53 | 0.24 | 0.0008                   |
| Model 2                            | 28.46                                                        | 0.35 | 28.09 | 0.36 | 27.91 | 0.36 | 27.22 | 0.38 | 27.49 | 0.40 | 0.0006                   |

Adjusted means and standard error of the mean (SE) presented. Orthogonal polynomial coefficients derived from median intake in each quintile were applied to estimate p-trend across quintiles of intake using general linear models. Model 1: age and sex. Model 2 adjusted for: age, sex ethnic category, marital status, final attained educational level, length or weekly working hours, smoking (current, previous, never), daily TV viewing hours and physical activity (IPAQ category) and continuous variable: alcohol intake (median g/day), continuous variables of mean daily intakes of: total energy, energy from saturated fat, polyunsaturated fat, non-milk extrinsic sugars (continuous variables). C-reactive protein log transformed for analyses.

**Table S9 and S10: Stratified by Goldberg classification of reporting – excludes participants reporting currently following a weight loss diet (n = 536)**

**Table S9** Under-reporters Estimated mean and body mass index, waist circumference, C-reactive protein and body fat by quintile of energy-adjusted total fibre intake (g/1000kcal) of Airwave Health Monitoring Study participants (n = 3,207)

|                                    | Quintiles of energy adjusted total fibre intake (g/1000kcal) |      |       |      |       |      |       |      |       |      | <i>P<sub>trend</sub></i> |
|------------------------------------|--------------------------------------------------------------|------|-------|------|-------|------|-------|------|-------|------|--------------------------|
|                                    | Q1                                                           |      | Q2    |      | Q3    |      | Q4    |      | Q5    |      |                          |
|                                    | Adjusted mean SE                                             |      |       |      |       |      |       |      |       |      |                          |
| Body mass index, kg/m <sup>2</sup> |                                                              |      |       |      |       |      |       |      |       |      |                          |
| Model 1                            | 27.73                                                        | 0.16 | 27.51 | 0.16 | 27.55 | 0.15 | 27.18 | 0.14 | 26.96 | 0.15 | <0.0001                  |
| Waist circumference, cm            |                                                              |      |       |      |       |      |       |      |       |      |                          |
| Model 1                            | 92.7                                                         | 0.72 | 92.01 | 0.71 | 91.91 | 0.69 | 91.52 | 0.69 | 90.86 | 0.73 | 0.0039                   |
| Model 2                            | 90.9                                                         | 0.40 | 90.60 | 0.40 | 90.34 | 0.39 | 90.52 | 0.39 | 90.12 | 0.41 | 0.0405                   |
| C-Reactive protein, mg/L           |                                                              |      |       |      |       |      |       |      |       |      |                          |
| Model 1                            | 1.32                                                         | 1.07 | 1.27  | 1.07 | 1.25  | 1.07 | 1.17  | 1.07 | 1.07  | 1.08 | 0.0008                   |
| Model 2                            | 1.22                                                         | 1.07 | 1.20  | 1.07 | 1.17  | 1.07 | 1.12  | 1.07 | 1.04  | 1.07 | 0.050                    |
| Body fat, %                        |                                                              |      |       |      |       |      |       |      |       |      |                          |
| Model 1                            | 30.1                                                         | 0.42 | 29.63 | 0.42 | 29.58 | 0.41 | 29.36 | 0.41 | 29.13 | 0.43 | 0.009                    |
| Model 2                            | 29.1                                                         | 0.27 | 28.85 | 0.26 | 28.71 | 0.25 | 28.80 | 0.25 | 28.72 | 0.27 | 0.12                     |

Adjusted means and standard error of the mean (SE) presented. Orthogonal polynomial coefficients derived from median intake in each quintile were applied to estimate p-trend across quintiles of intake using general linear models. Model 1 adjusted for: age, sex ethnic category, marital status, final attained educational level, length or weekly working hours, smoking (current, previous, never), daily TV viewing hours and physical activity (IPAQ category) and continuous variable: alcohol intake (median g/day), continuous variables of mean daily intakes of: total energy, energy from saturated fat, carbohydrate, polyunsaturated fat, non-milk extrinsic sugars (continuous variables). Model 2 additionally adjusted for body mass index (continuous). C-reactive protein log transformed for analyses.

**Table S10** Acceptable energy intake reporters: Estimated mean and body mass index, waist circumference, C-reactive protein and body fat by quintile of energy-adjusted total fibre intake (g/1000kcal) of Airwave Health Monitoring Study participants ( $n = 3155$ )

|                                    | Quintiles of energy adjusted total fibre intake (g/1000kcal) |      |       |      |       |      |       |      |       |      |             |
|------------------------------------|--------------------------------------------------------------|------|-------|------|-------|------|-------|------|-------|------|-------------|
|                                    | Q1                                                           |      | Q2    |      | Q3    |      | Q4    |      | Q5    |      | $P_{trend}$ |
|                                    | Adjusted mean SE                                             |      |       |      |       |      |       |      |       |      |             |
| Body mass index, kg/m <sup>2</sup> |                                                              |      |       |      |       |      |       |      |       |      |             |
| Model 1                            | 26.13                                                        | 0.25 | 26.05 | 0.26 | 26.00 | 0.26 | 25.54 | 0.27 | 24.98 | 0.28 | <0.0001     |
| Waist circumference, cm            |                                                              |      |       |      |       |      |       |      |       |      |             |
| Model 1                            | 86.26                                                        | 0.62 | 86.17 | 0.64 | 86.18 | 0.65 | 84.85 | 0.67 | 83.48 | 0.71 | <0.0001     |
| Model 2                            | 85.68                                                        | 0.35 | 85.69 | 0.36 | 85.78 | 0.36 | 85.34 | 0.38 | 85.04 | 0.40 | 0.0389      |
| C-Reactive protein, mg/L           |                                                              |      |       |      |       |      |       |      |       |      |             |
| Model 1                            | 1.00                                                         | 1.08 | 0.95  | 1.08 | 0.96  | 1.08 | 0.85  | 1.08 | 0.73  | 1.09 | <0.0001     |
| Model 2                            | 0.98                                                         | 1.07 | 0.93  | 1.07 | 0.94  | 1.07 | 0.87  | 1.08 | 0.78  | 1.08 | 0.0006      |
| Body fat, %                        |                                                              |      |       |      |       |      |       |      |       |      |             |
| Model 1                            | 26.41                                                        | 0.44 | 26.38 | 0.45 | 26.14 | 0.46 | 25.24 | 0.47 | 24.71 | 0.50 | <0.0001     |
| Model 2                            | 26.02                                                        | 0.27 | 26.06 | 0.28 | 25.88 | 0.28 | 25.57 | 0.29 | 25.75 | 0.31 | 0.13        |

Adjusted means and standard error of the mean (SE) presented. Orthogonal polynomial coefficients derived from median intake in each quintile were applied to estimate p-trend across quintiles of intake using general linear models. Model 1 adjusted for: age, sex ethnic category, marital status, final attained educational level, length or weekly working hours, smoking (current, previous, never), daily TV viewing hours and physical activity (IPAQ category) and continuous variable: alcohol intake (median g/day), continuous variables of mean daily intakes of: total energy, energy from saturated fat, carbohydrate, polyunsaturated fat, non-milk extrinsic sugars (continuous variables). Model 2 additionally adjusted for body mass index (continuous). C-reactive protein log transformed for analyses, back transformed values presented.
